# Supplementary material
Source: PubMed Central journal article supplement (PMC7775894)

---

# Supplementary Material

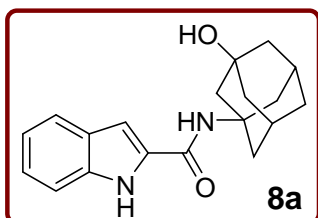

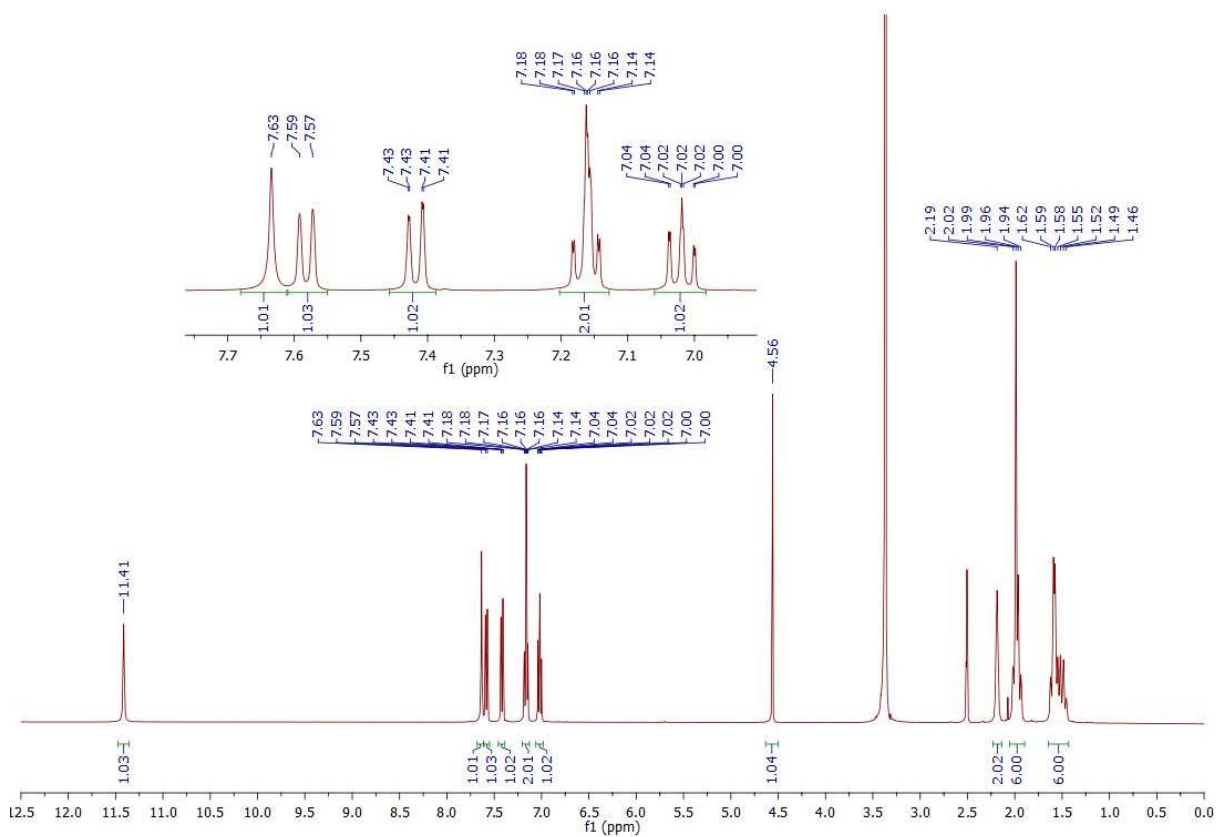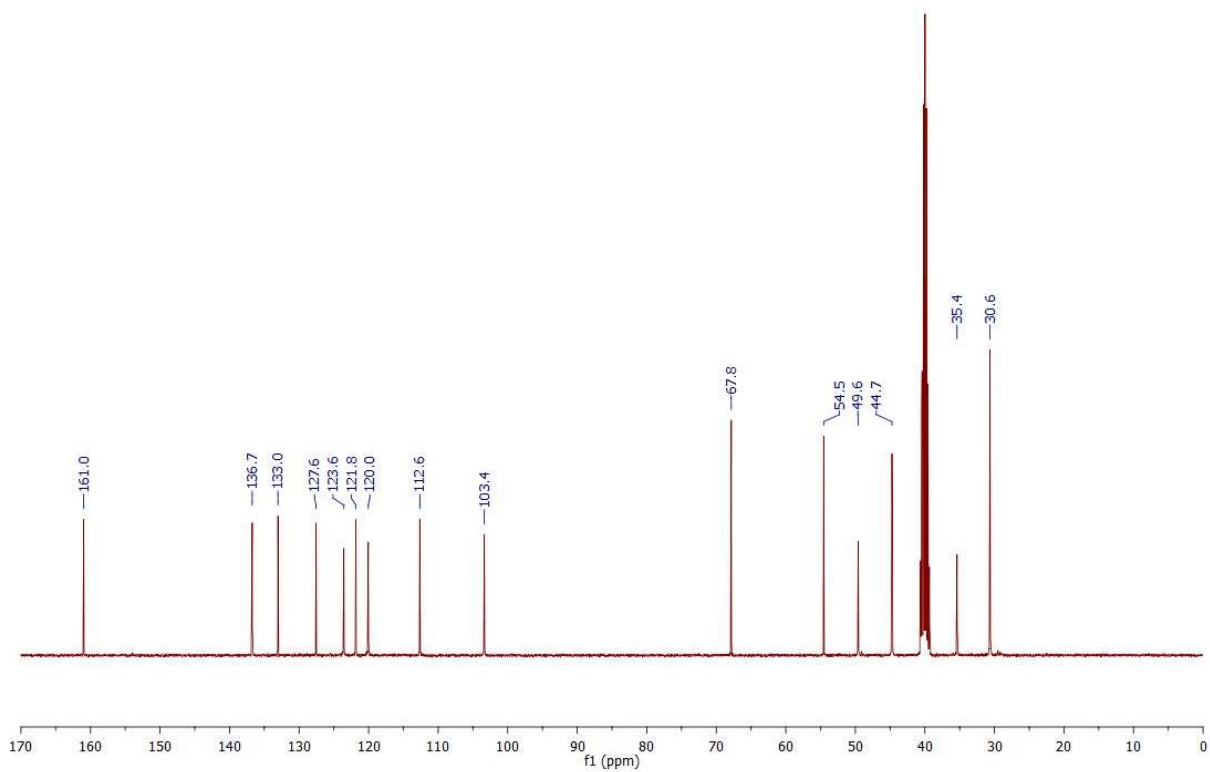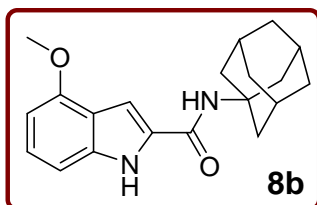

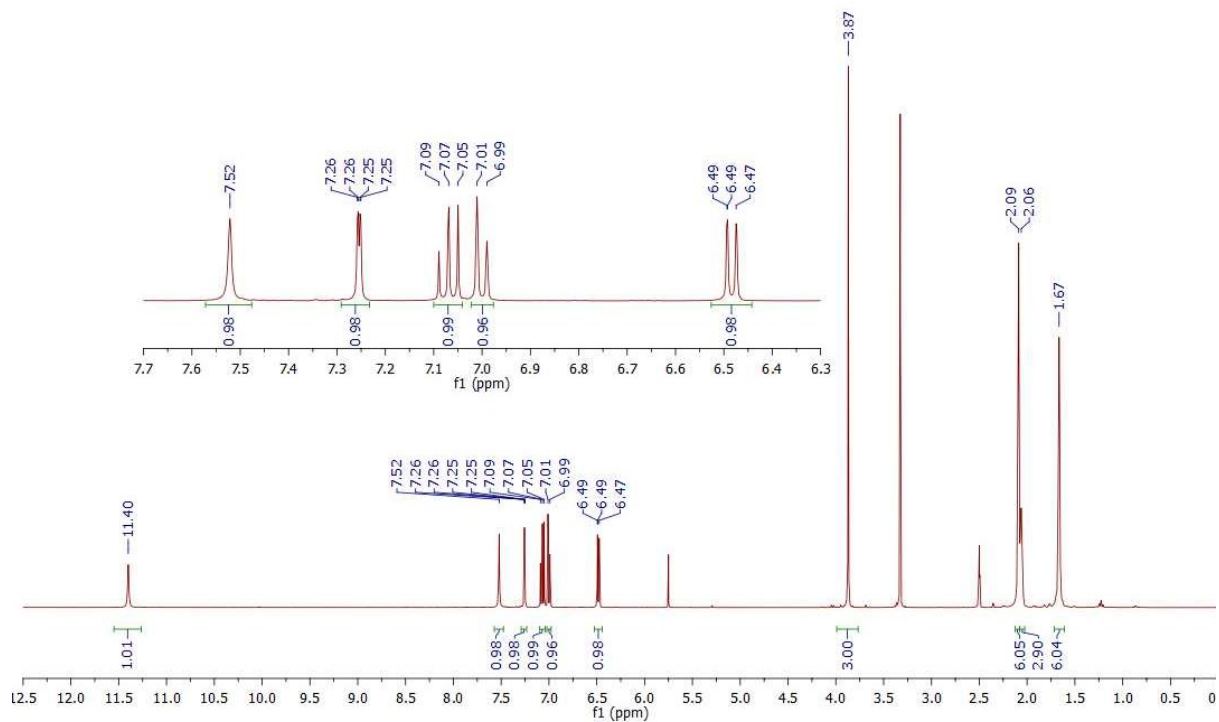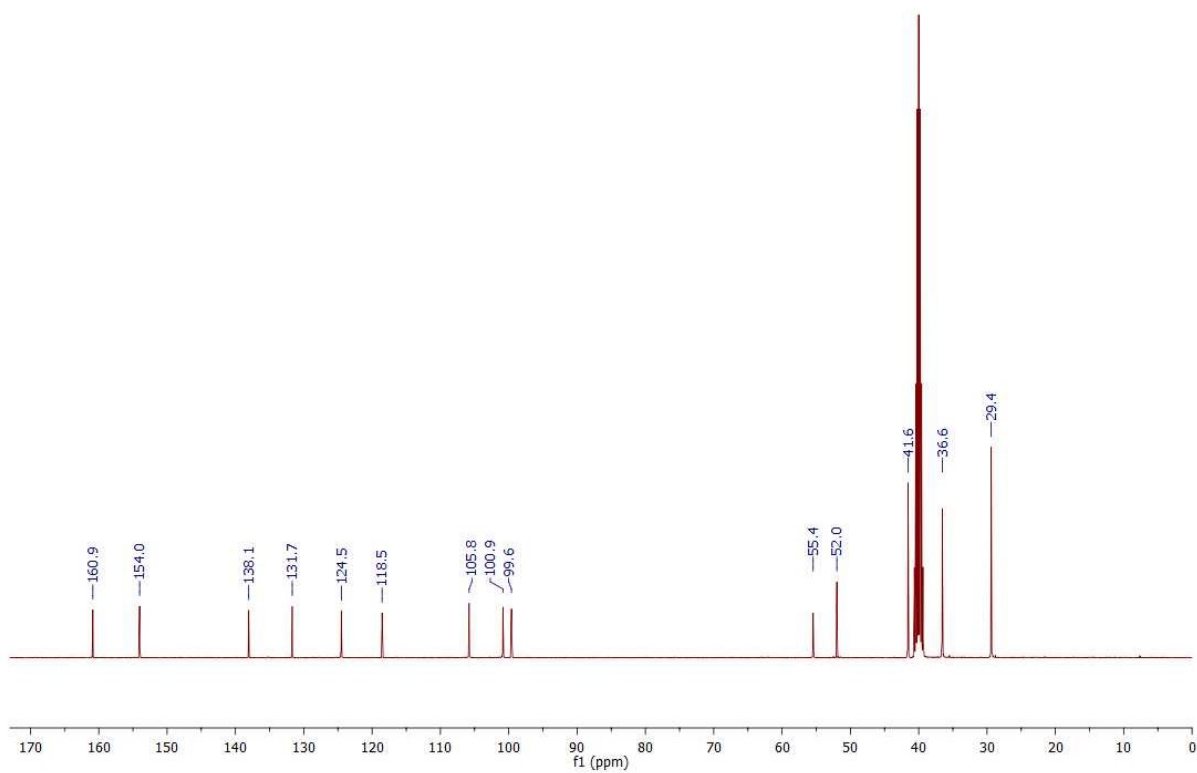

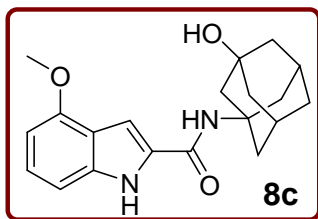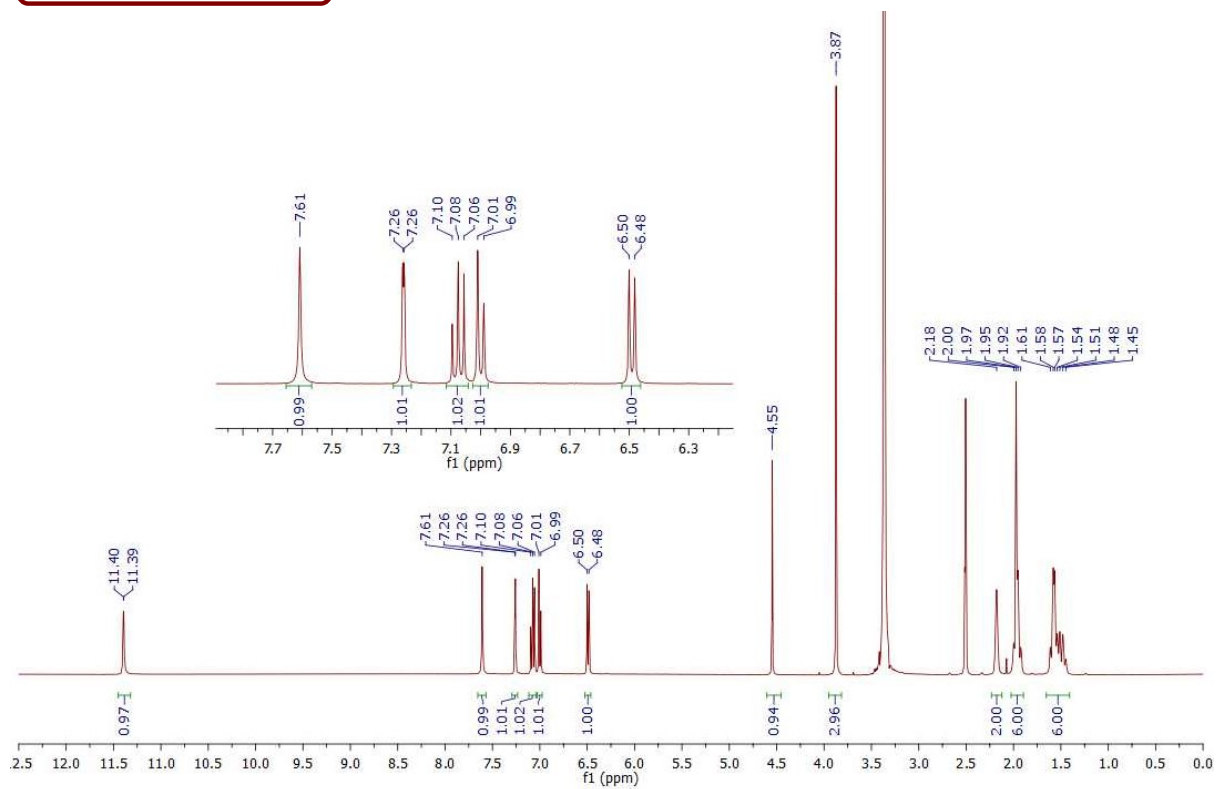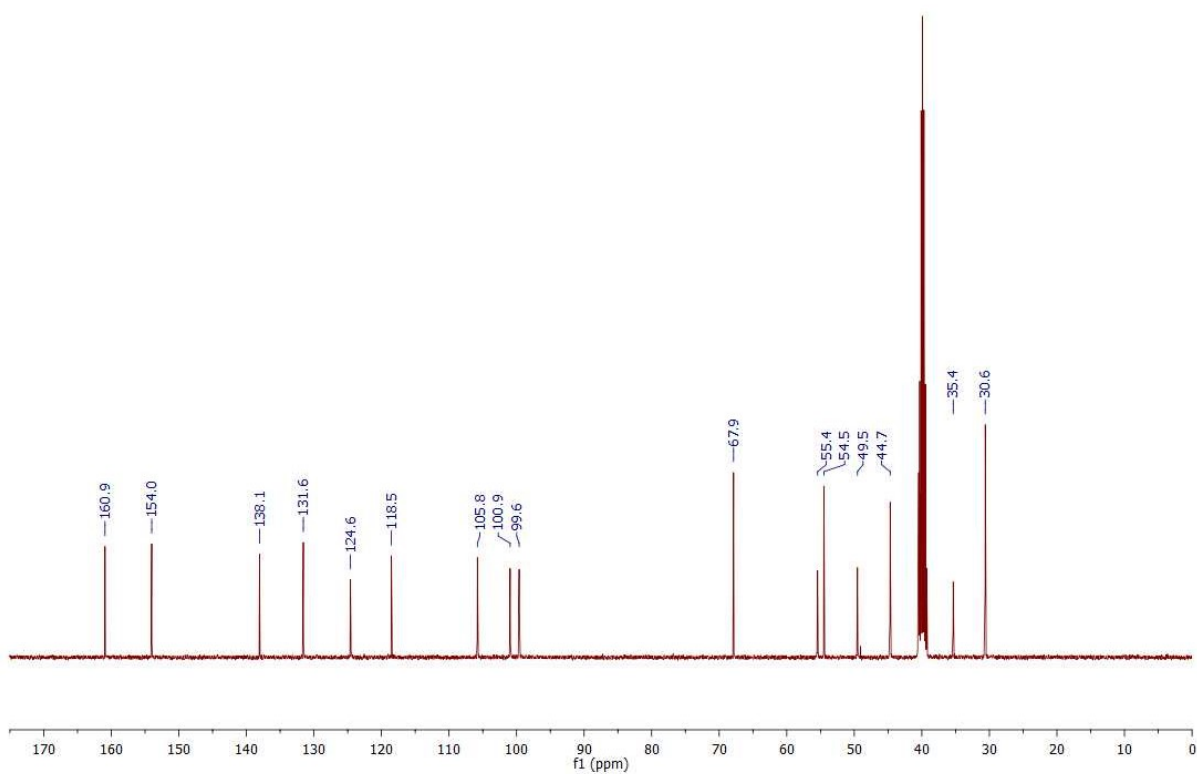

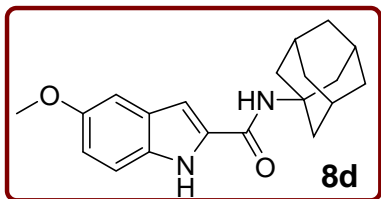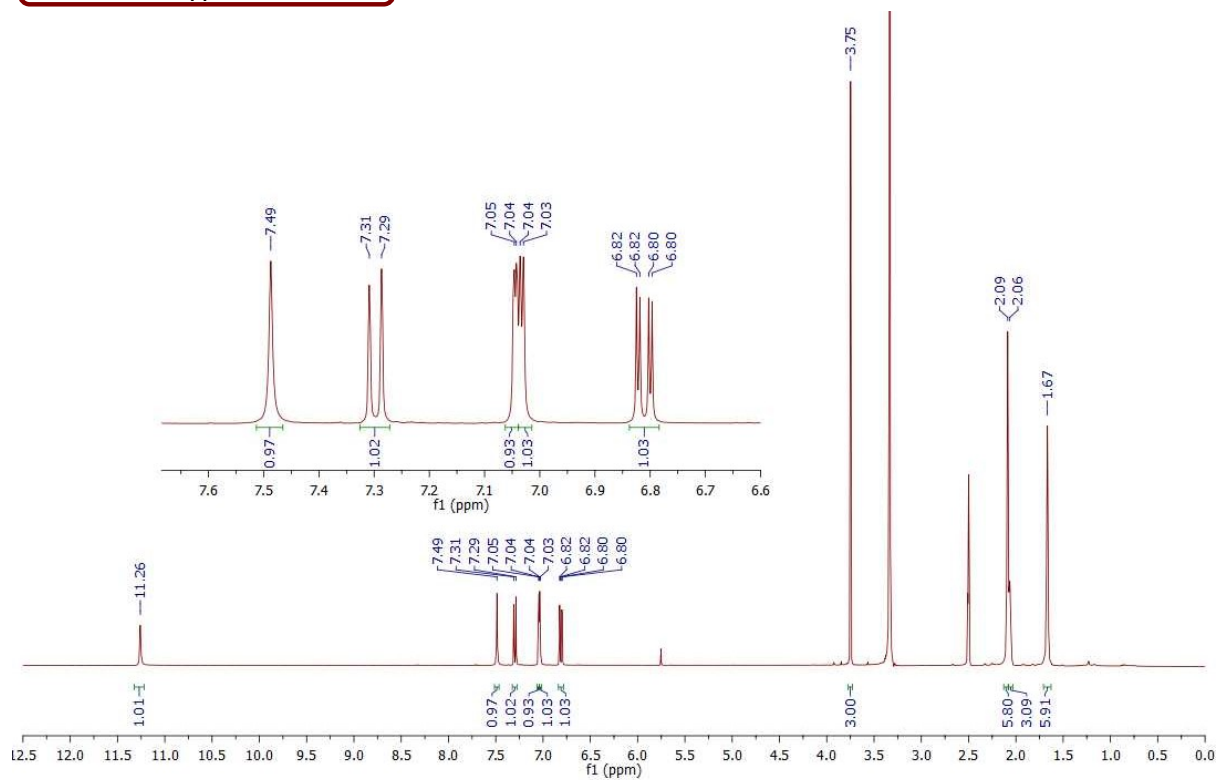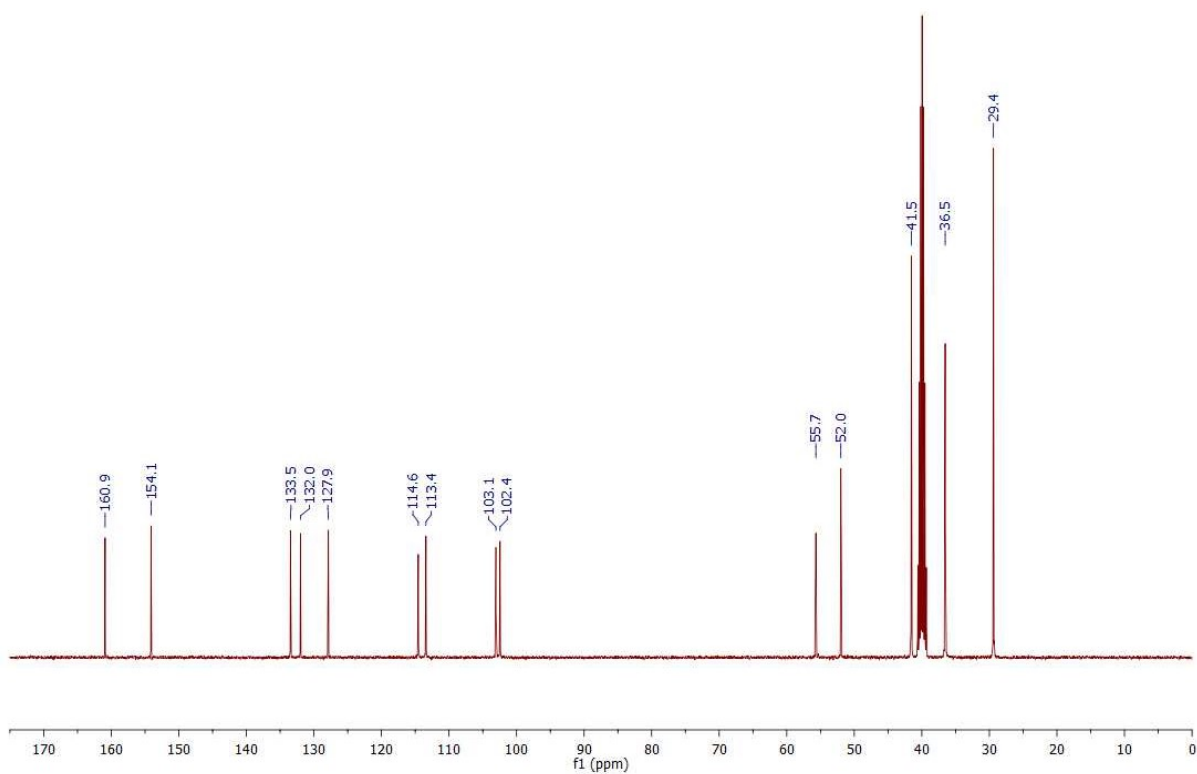

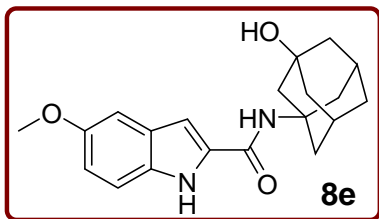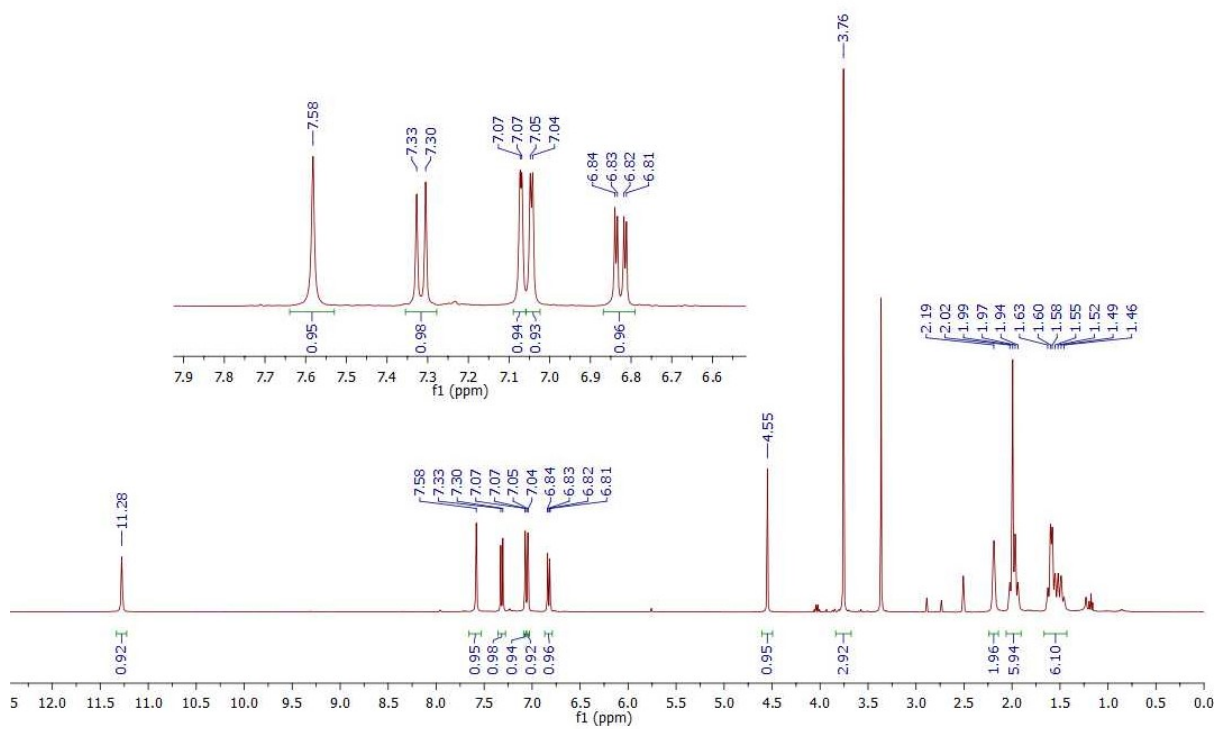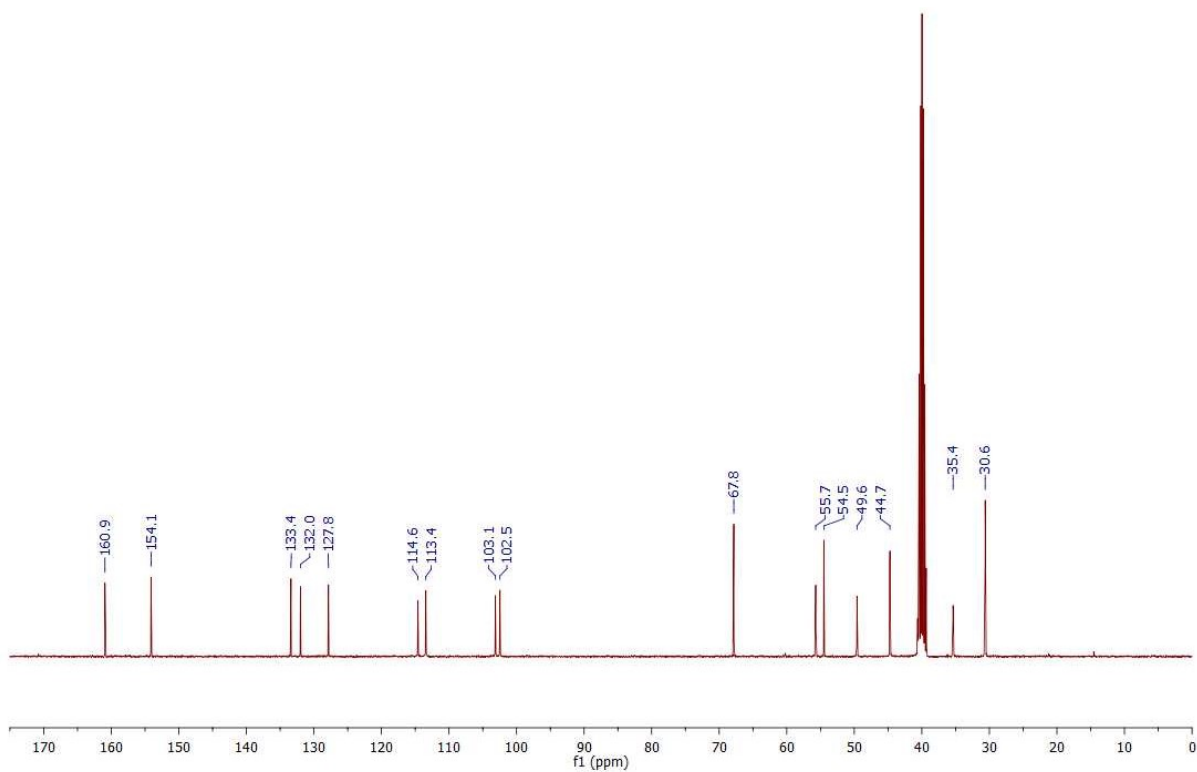

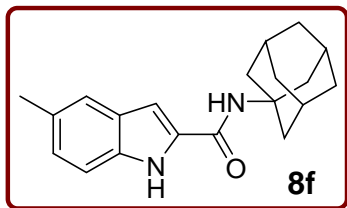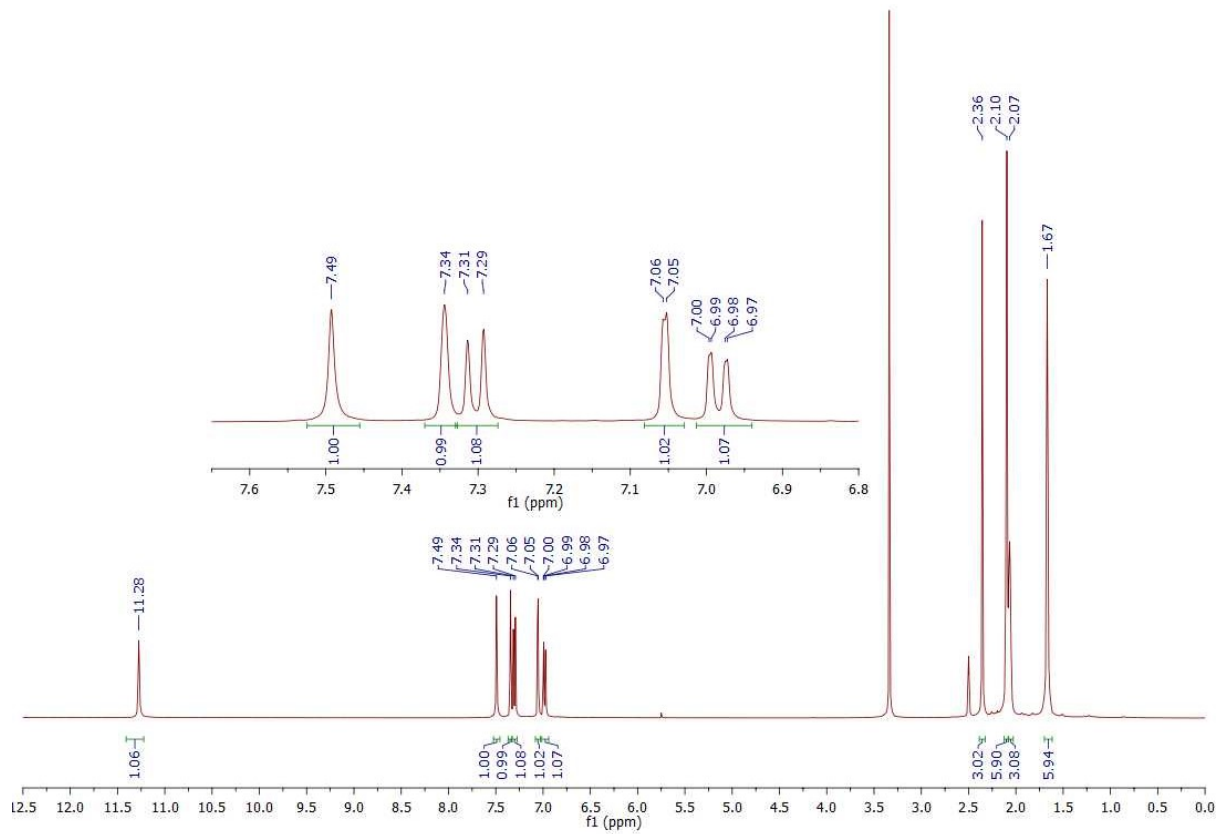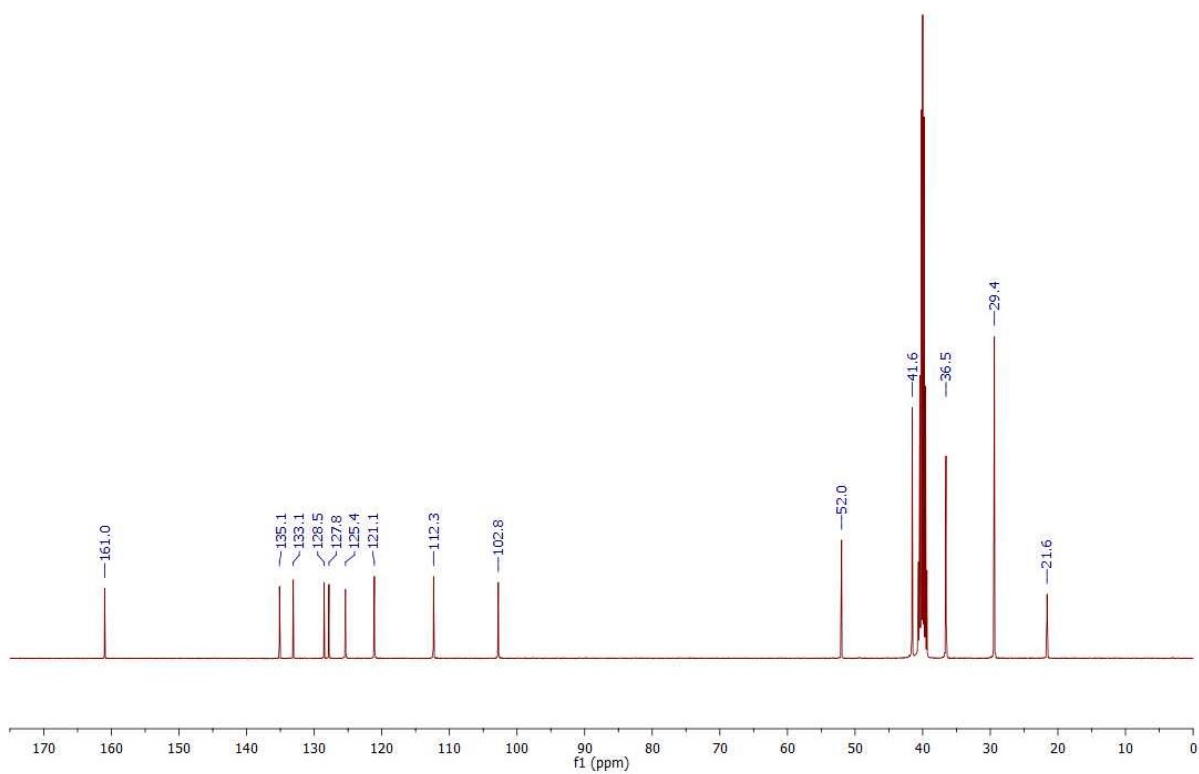

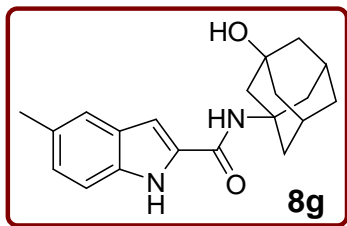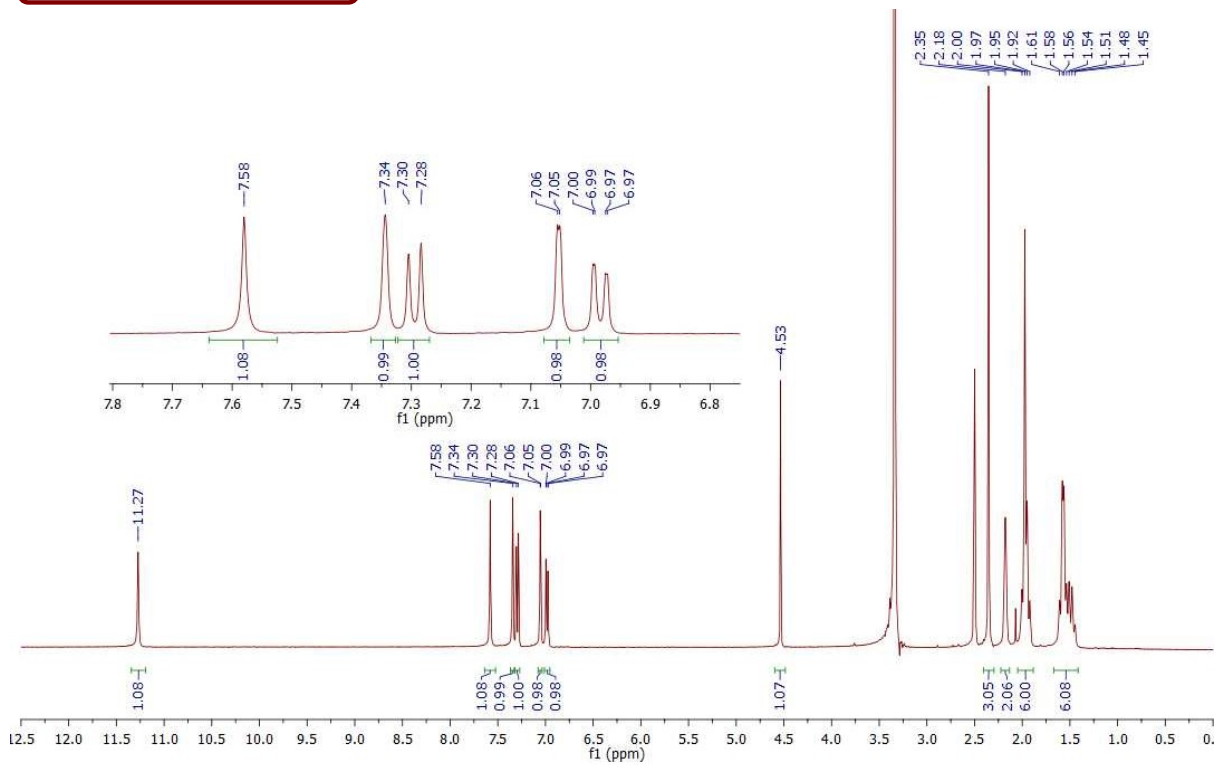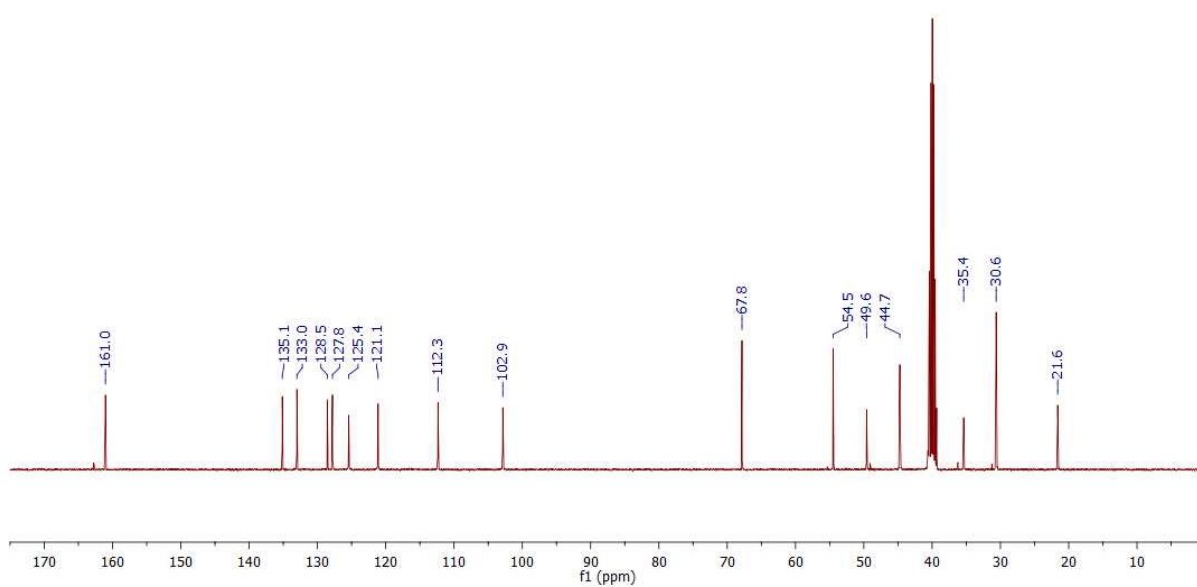



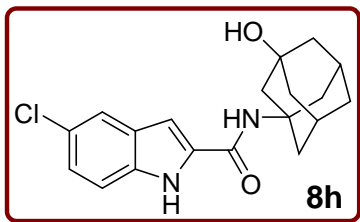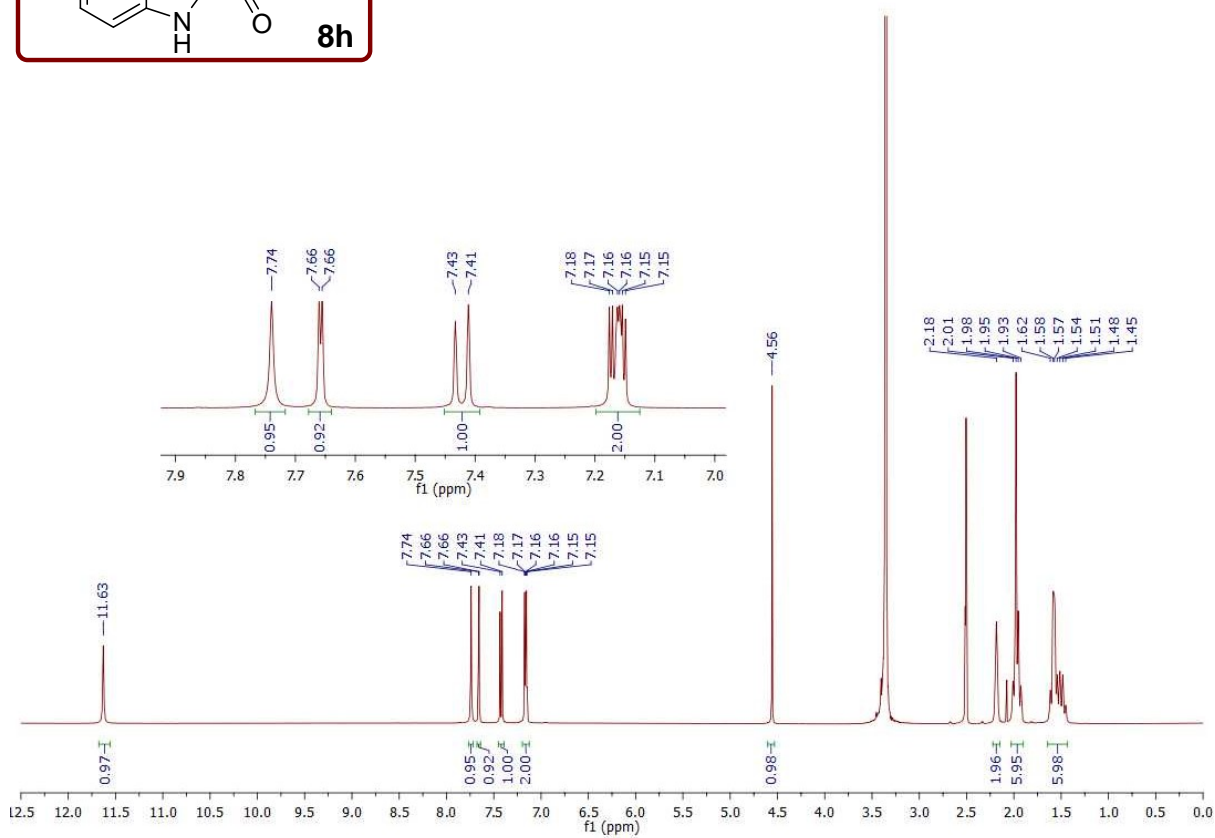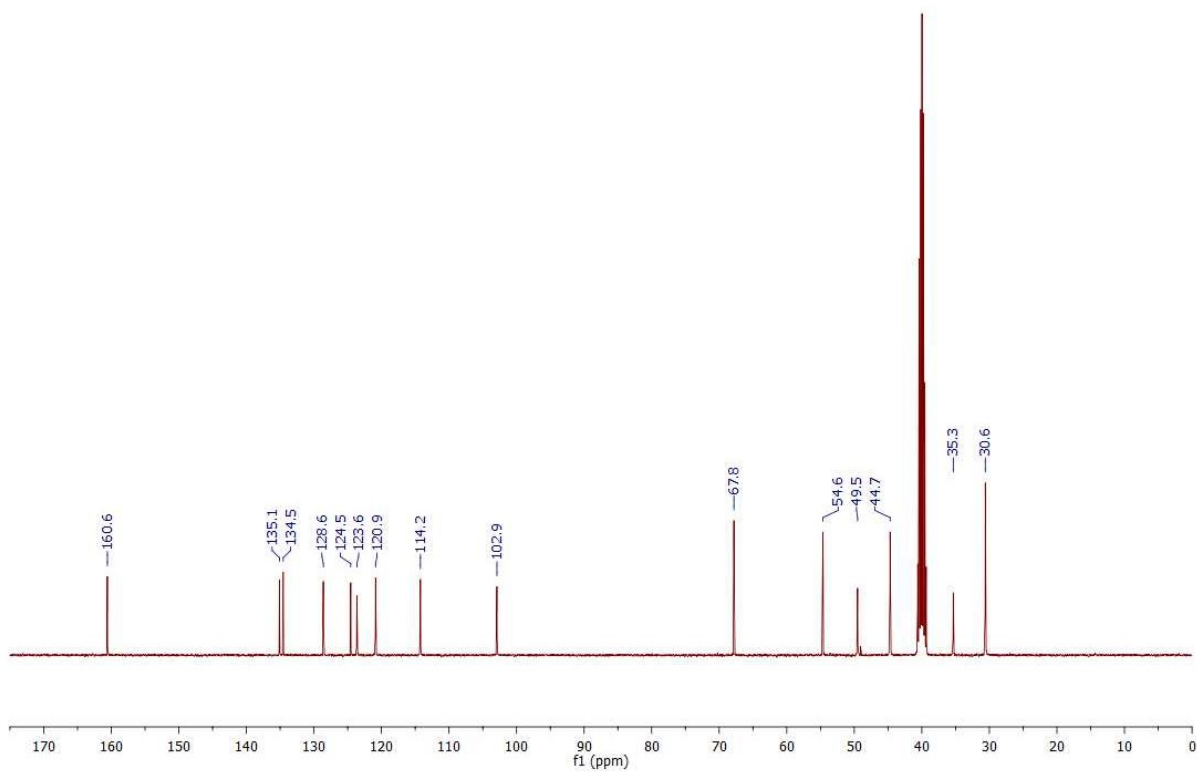

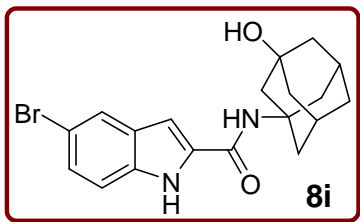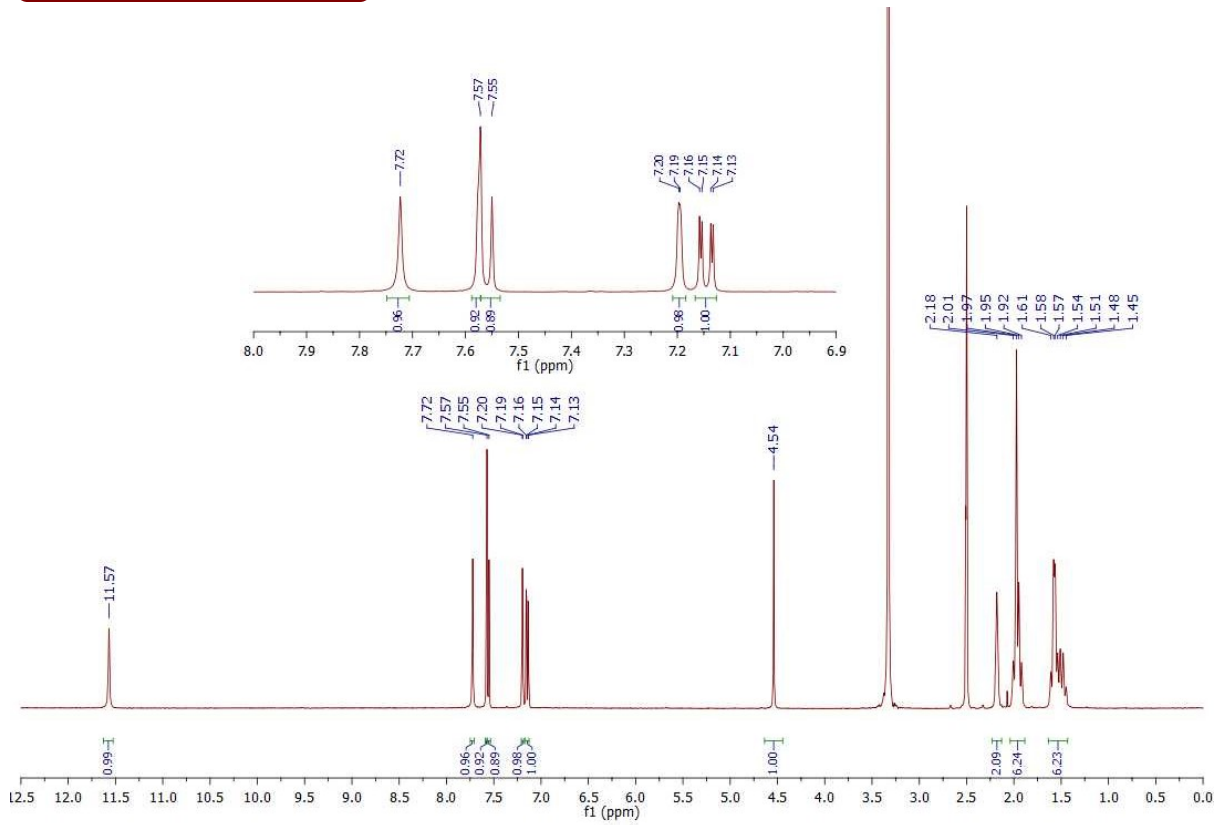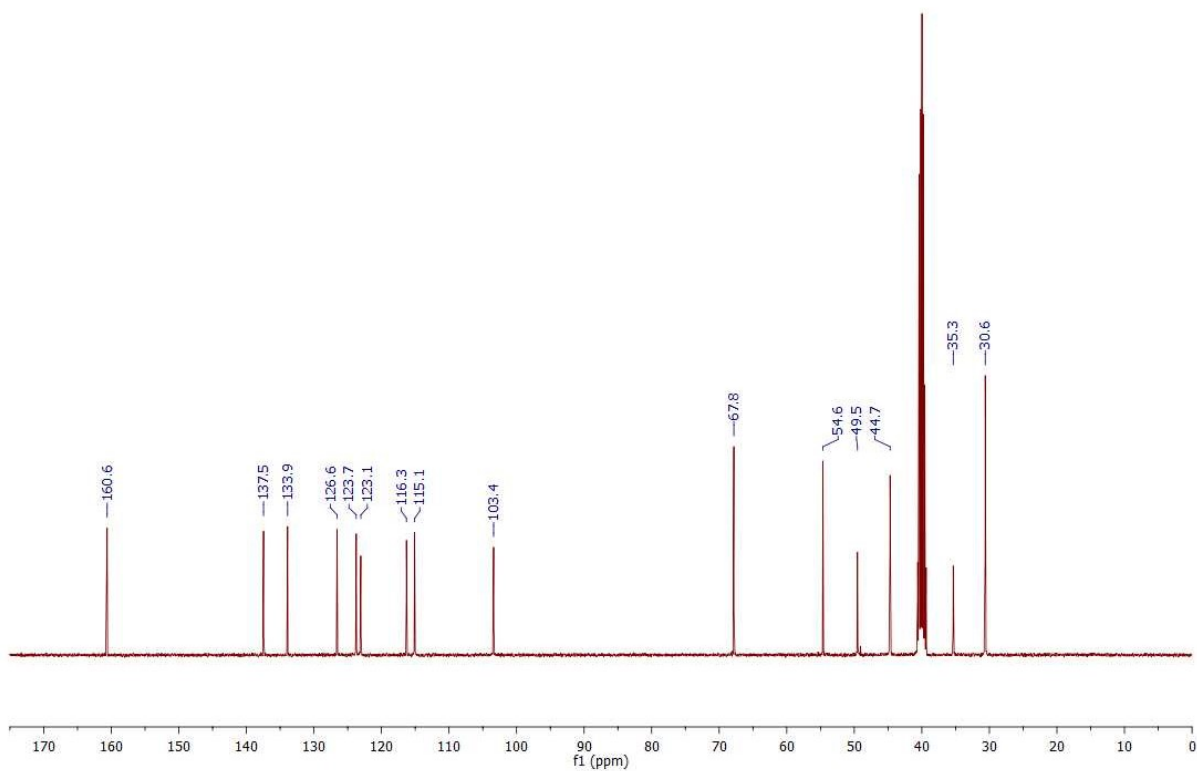

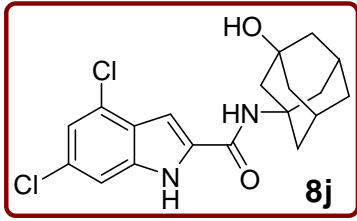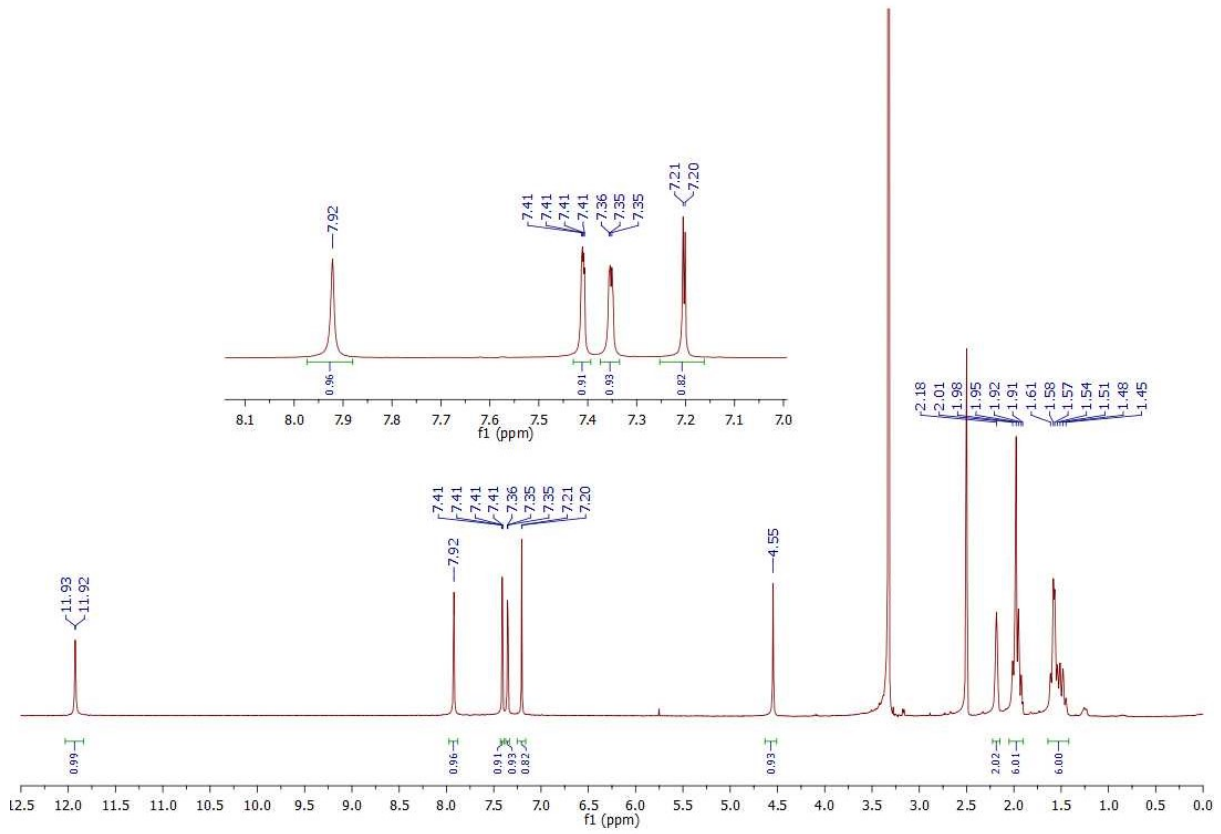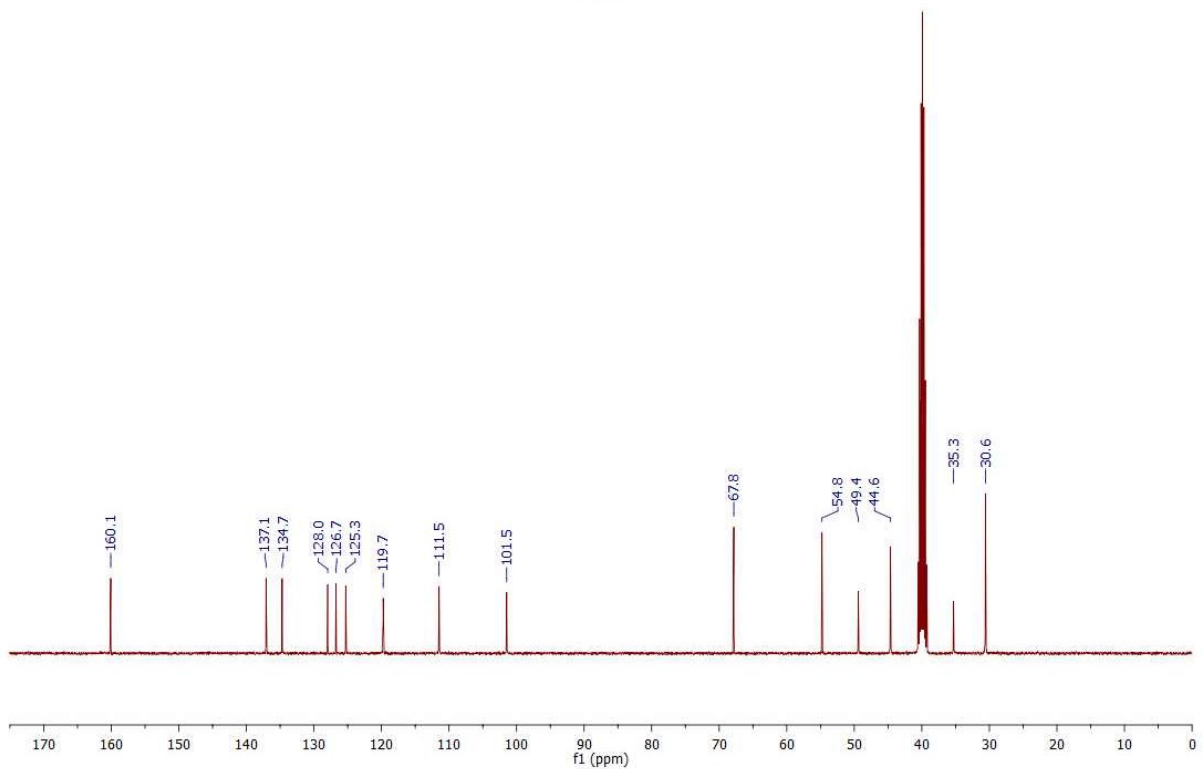

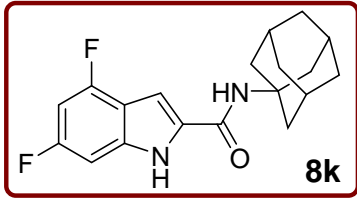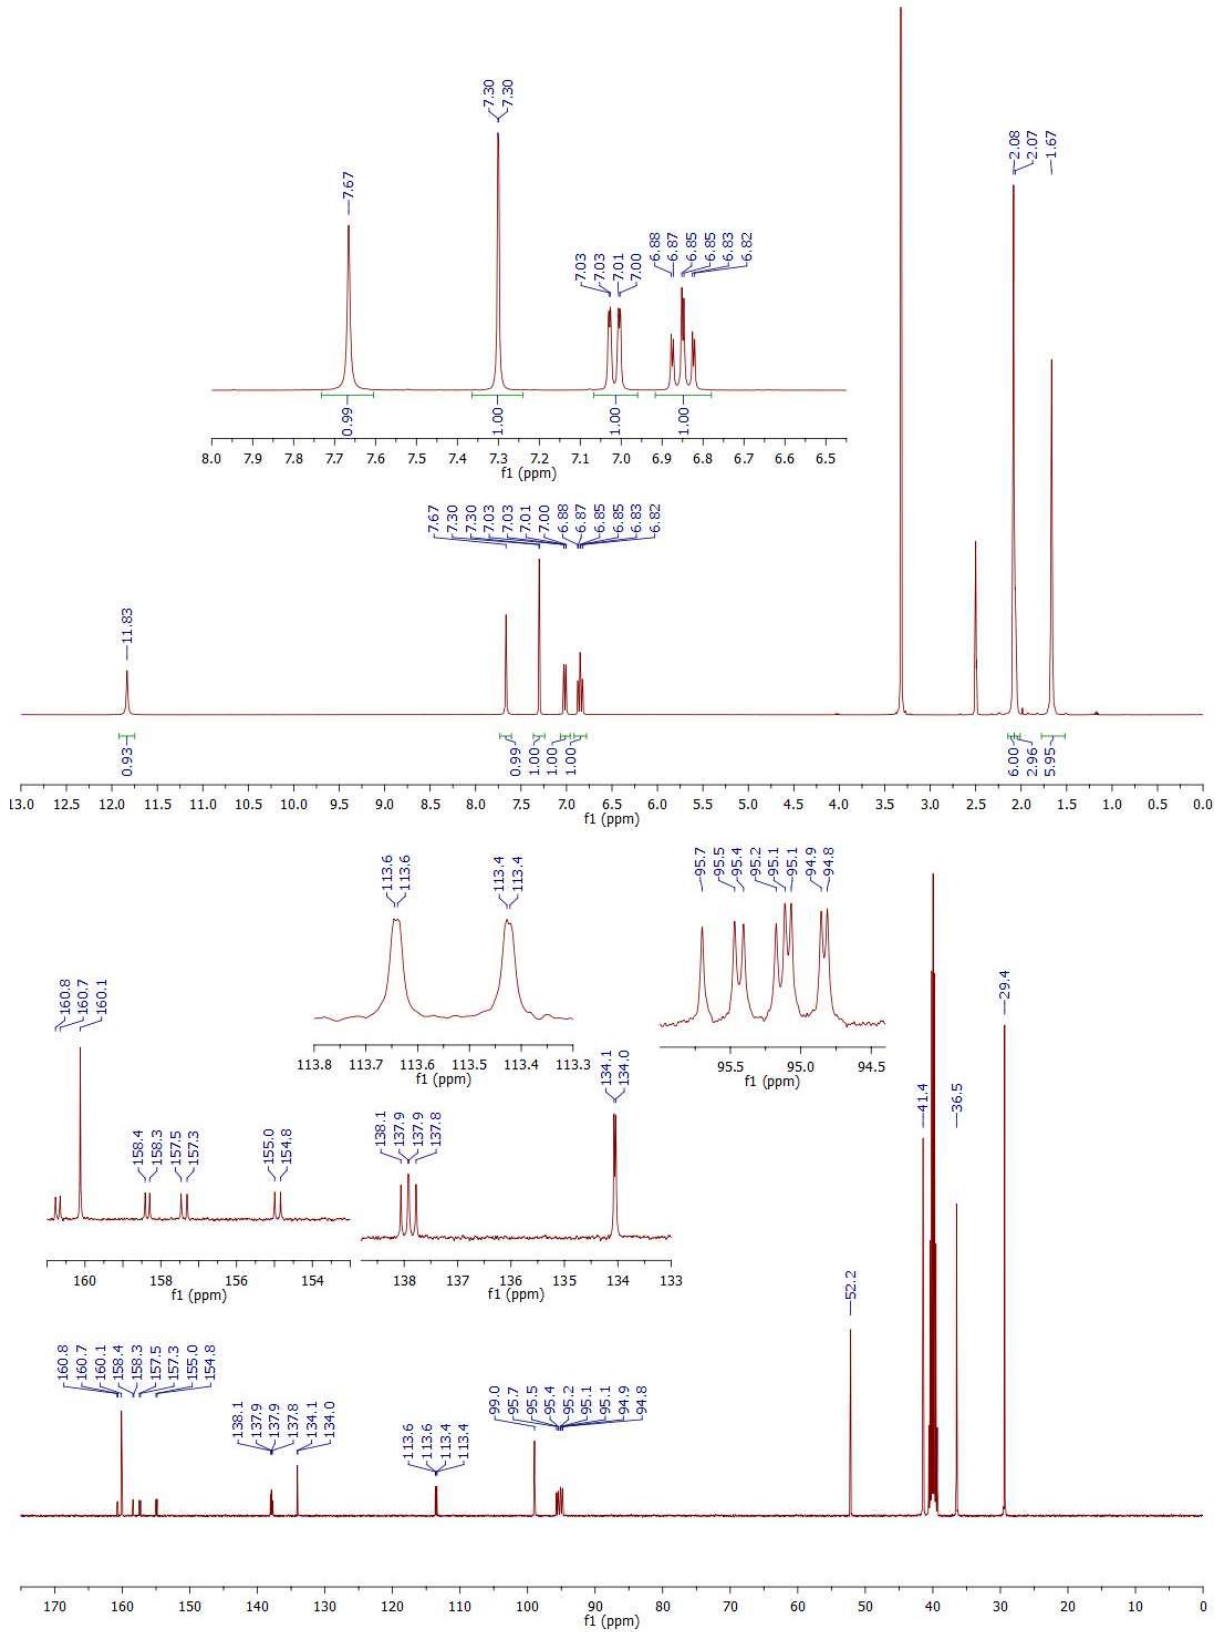

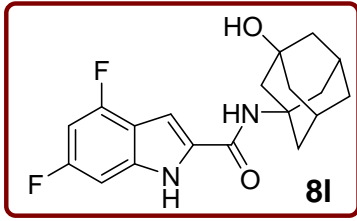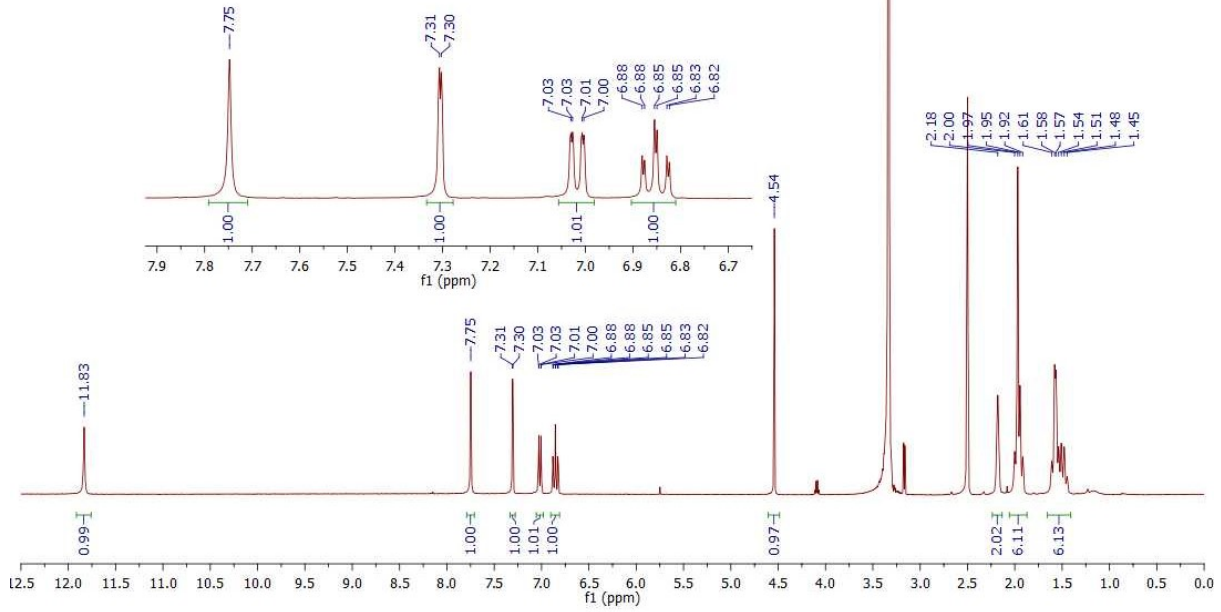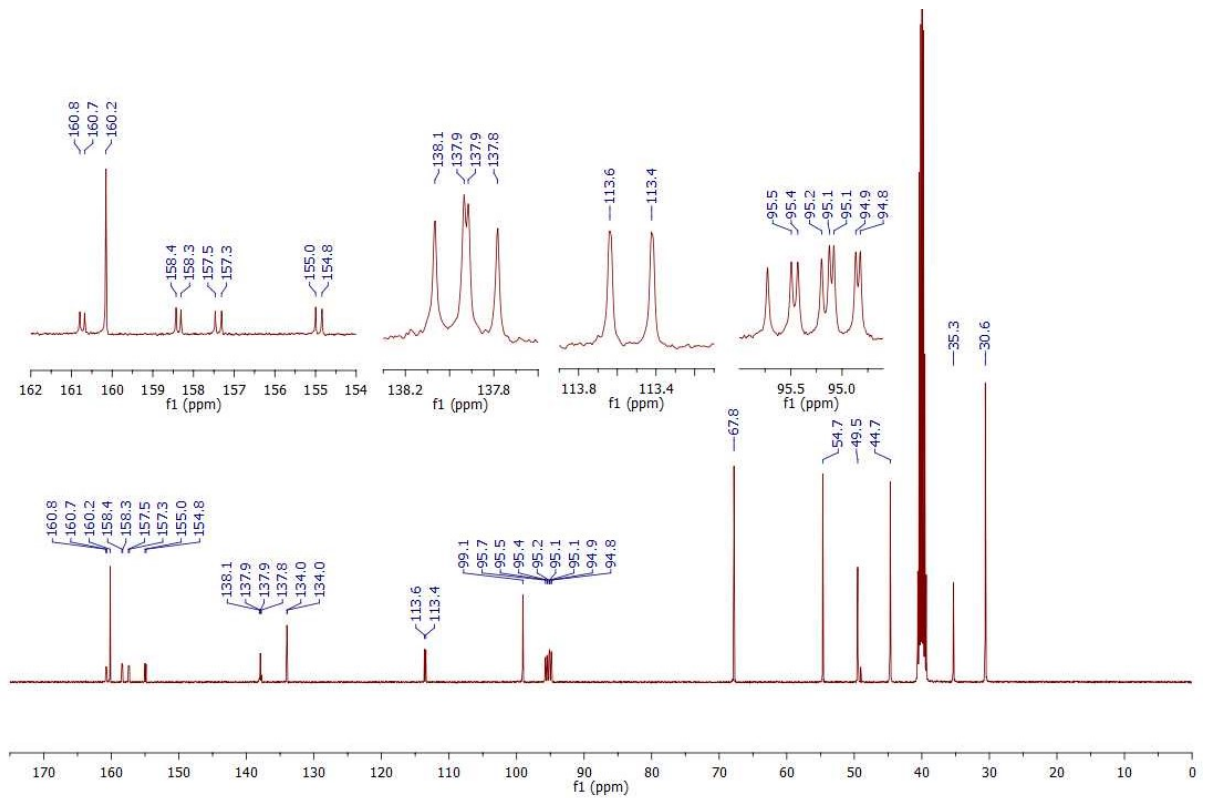

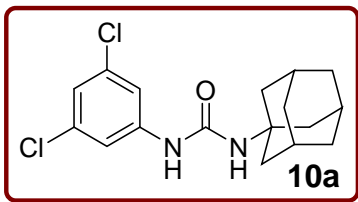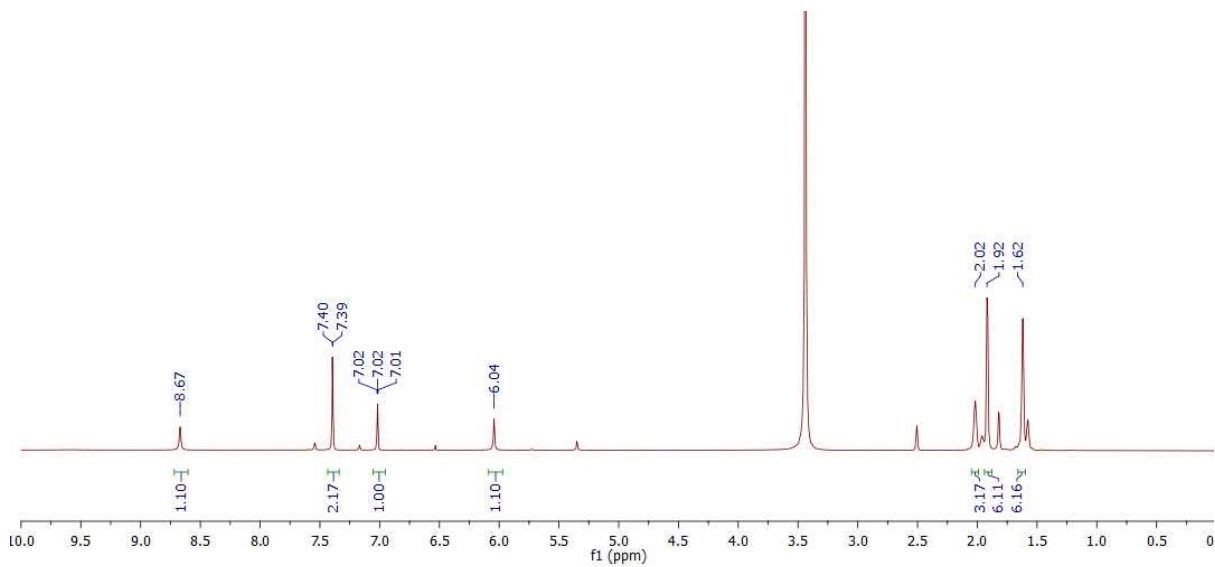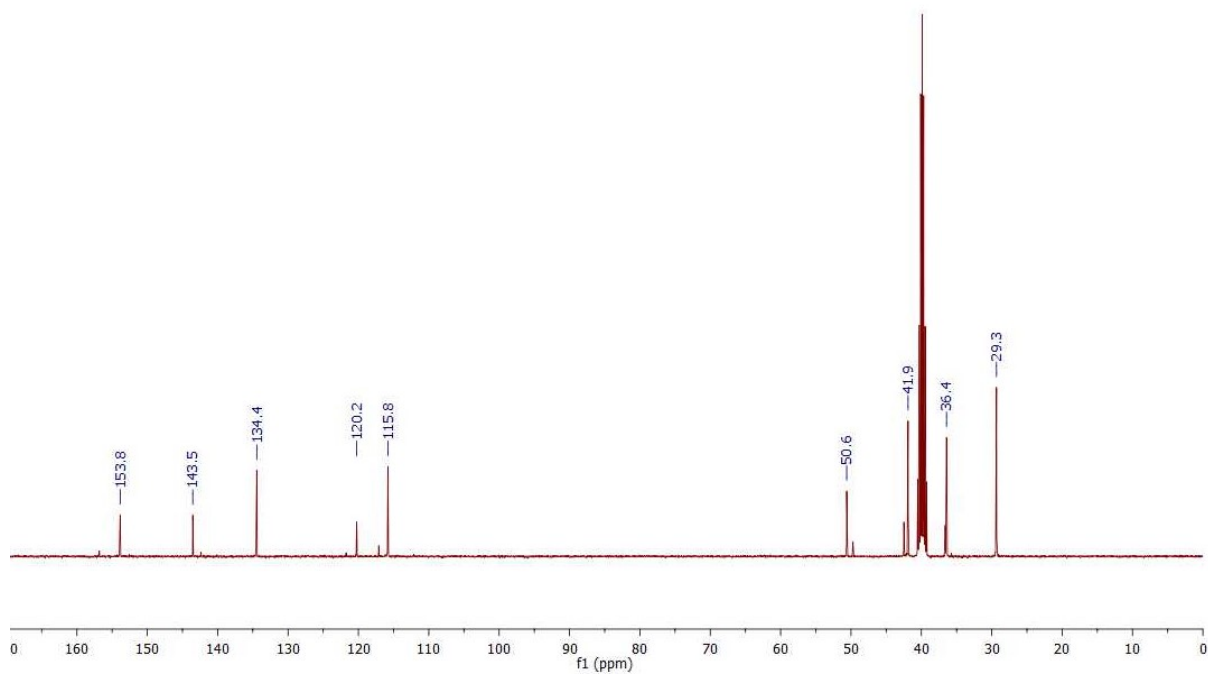

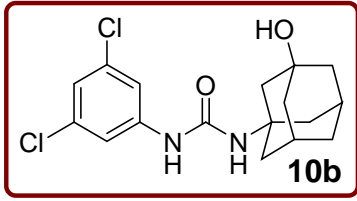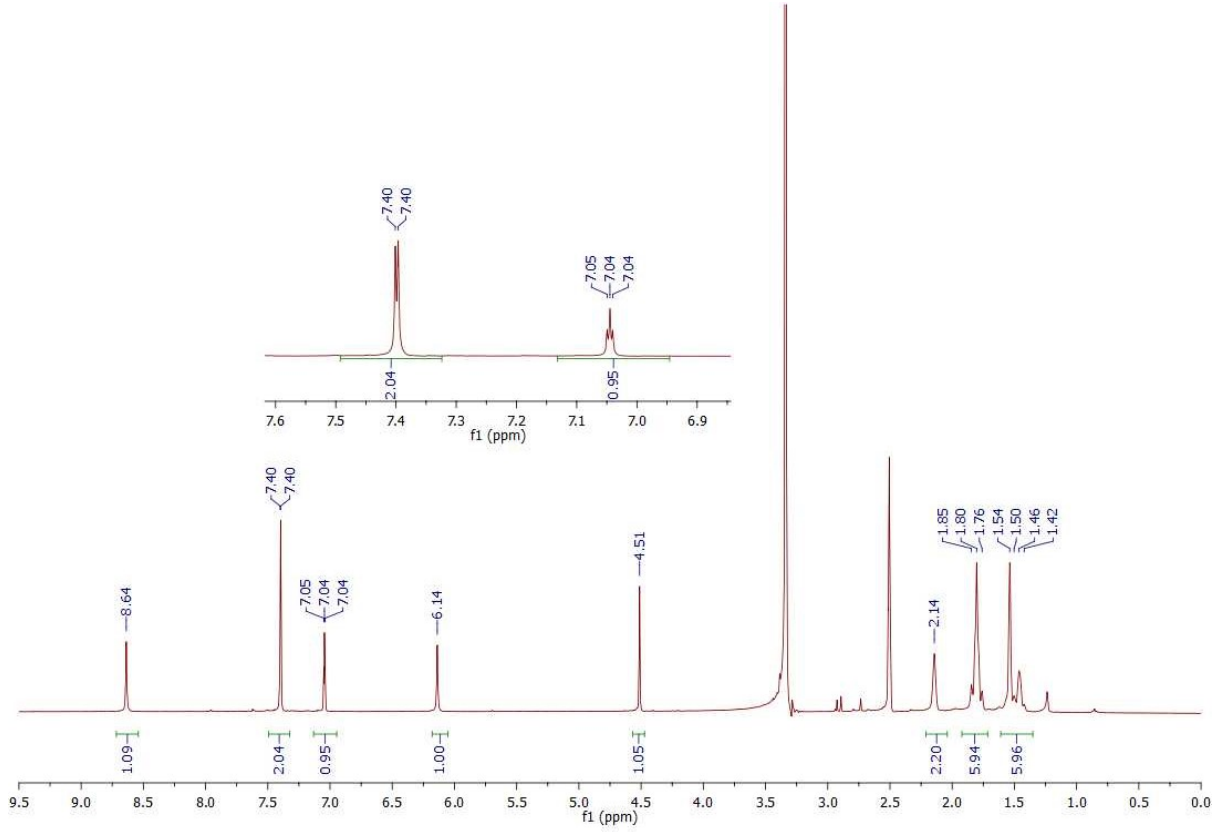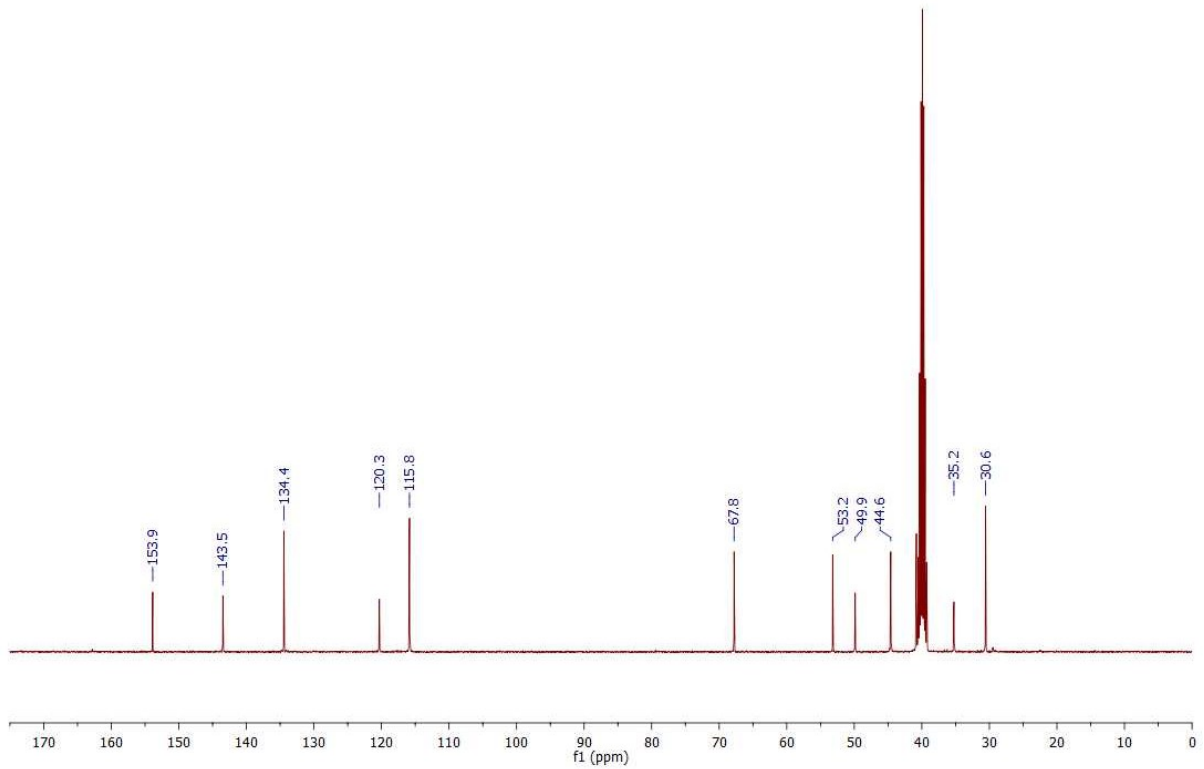

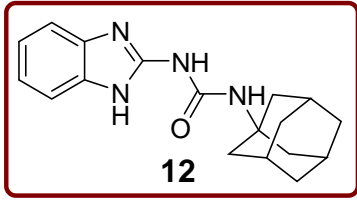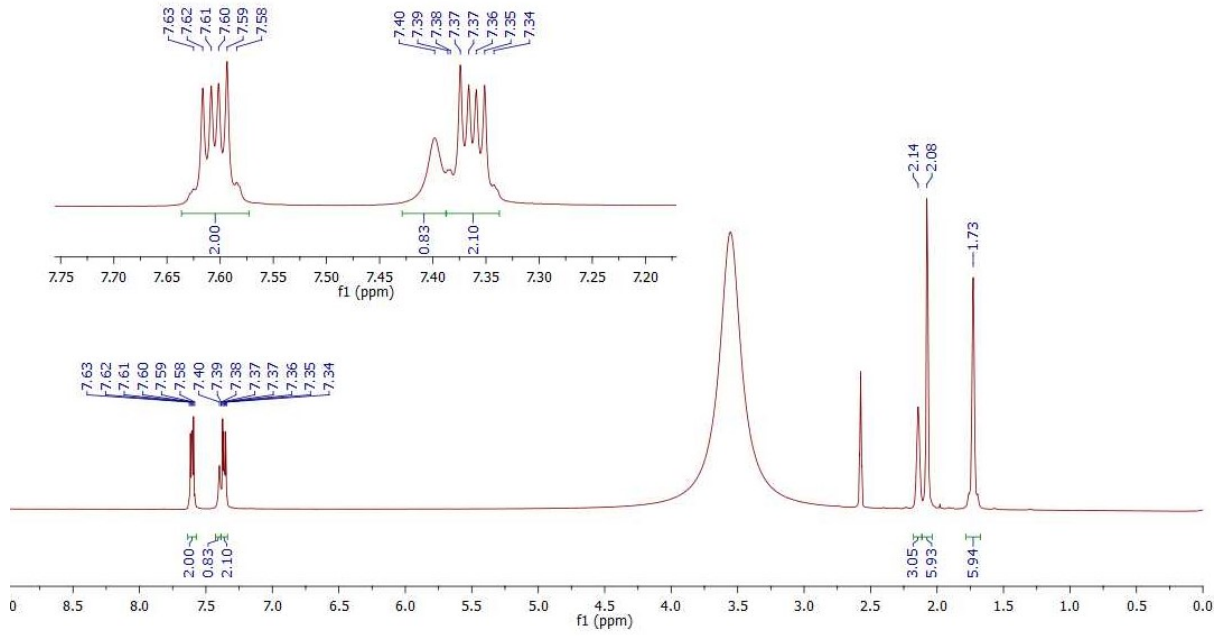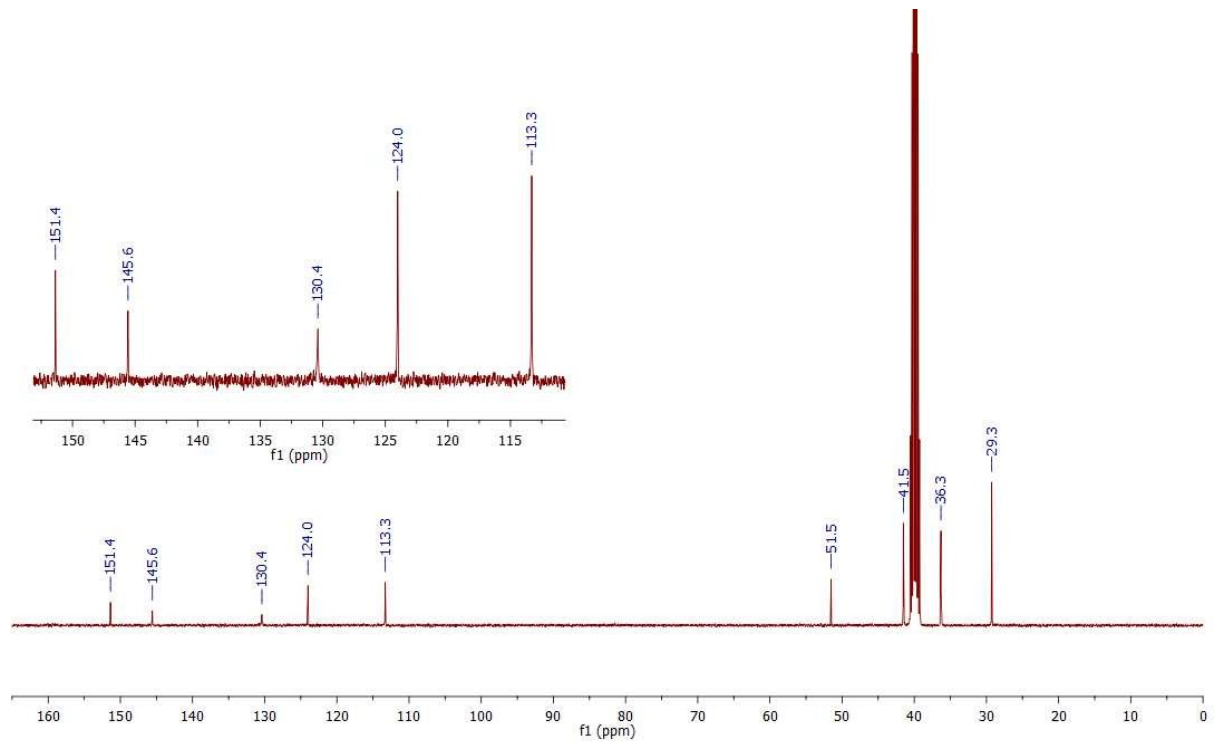



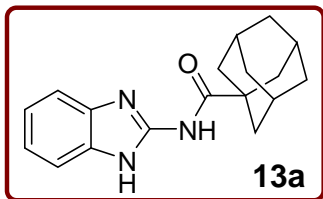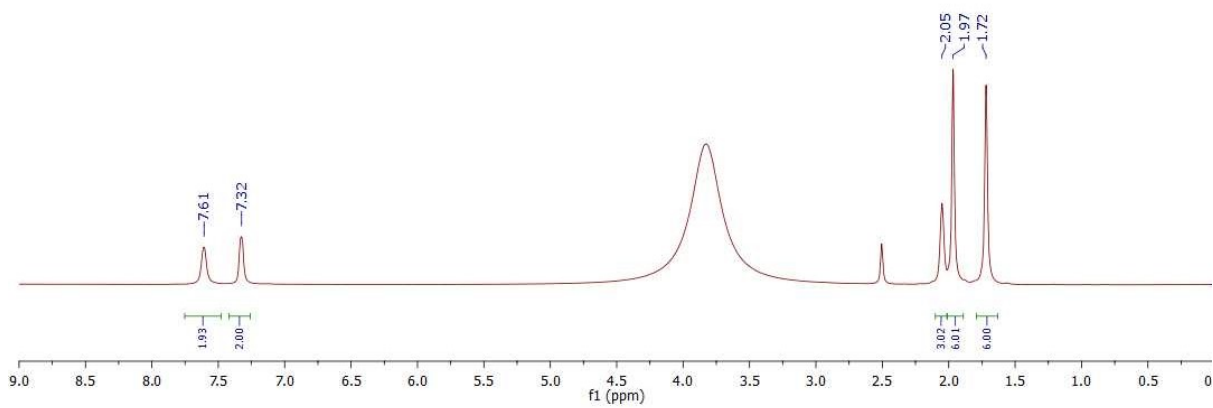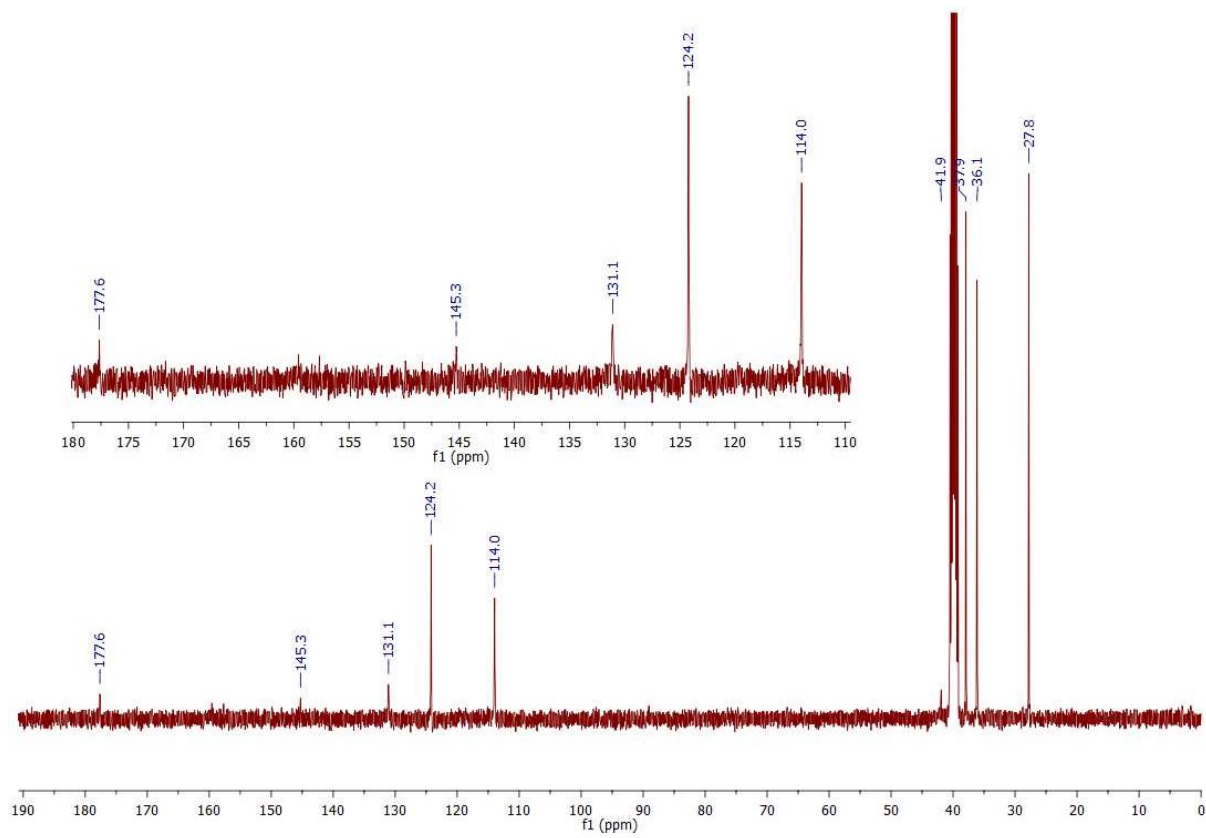

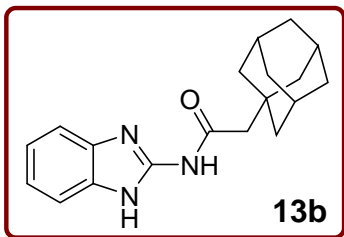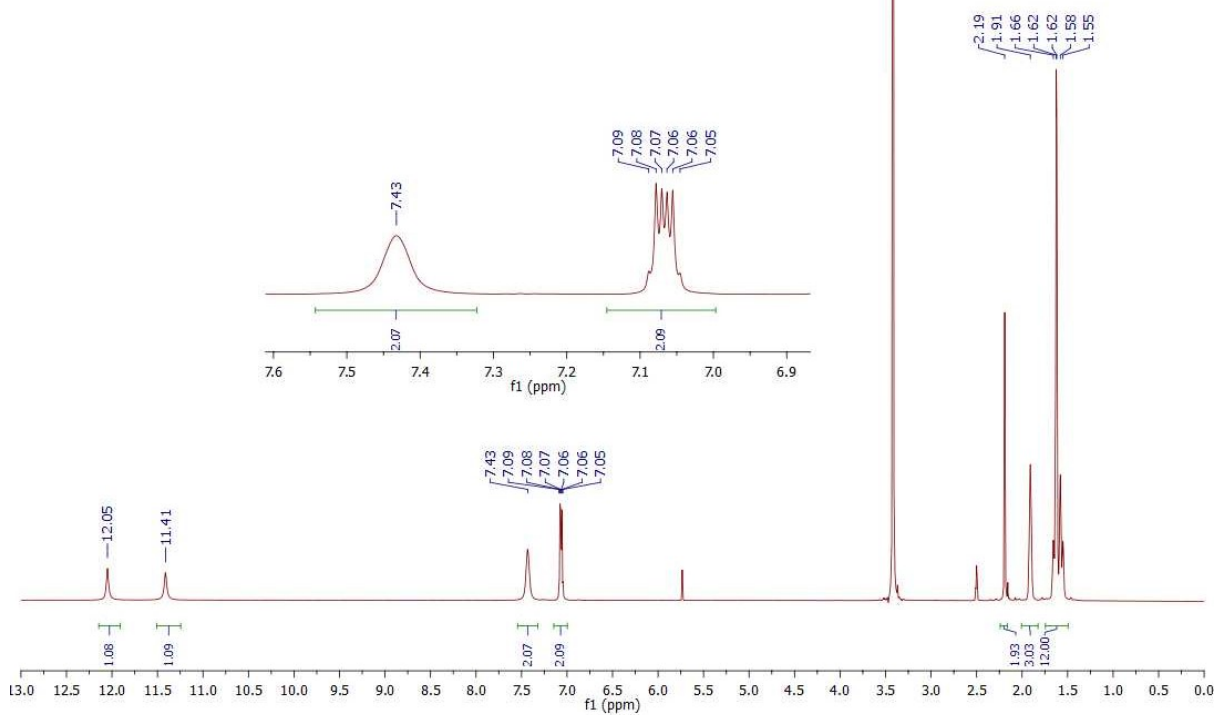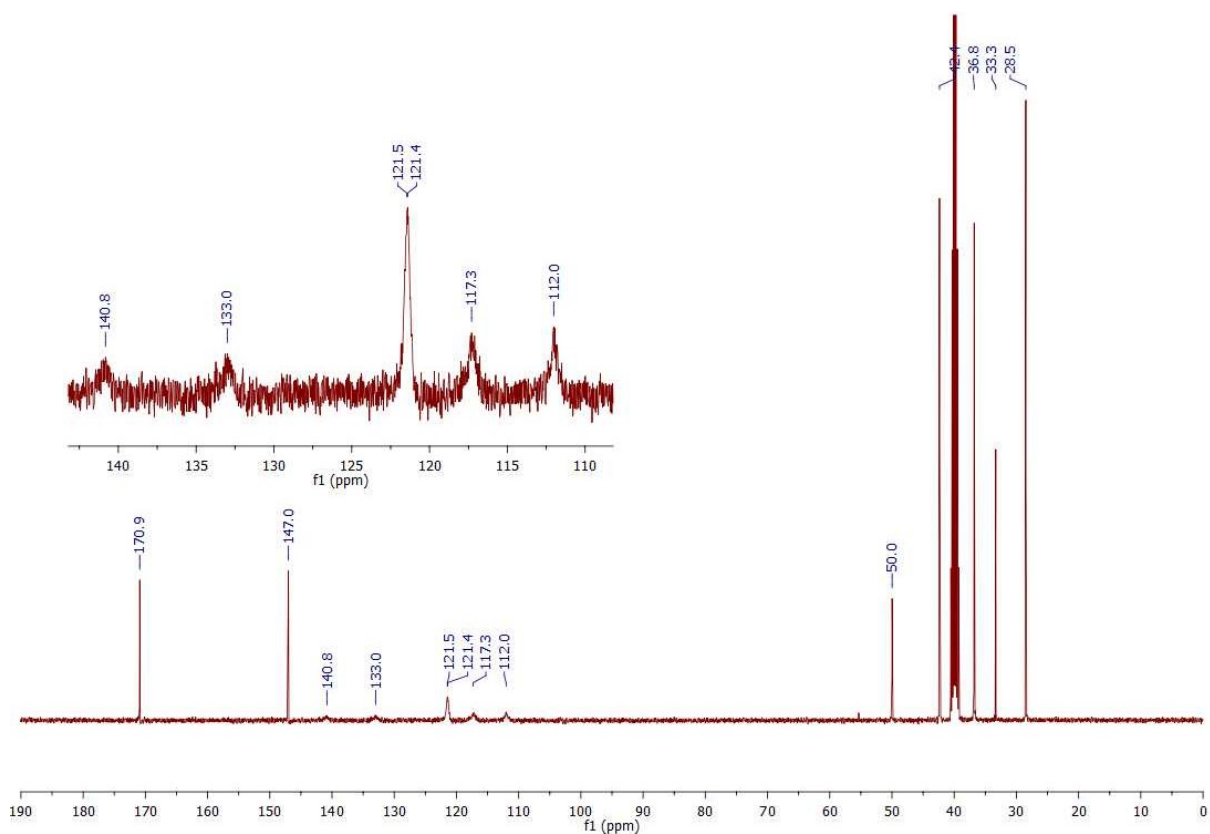

Supplement: NIHMS1651220-supplement-1.pdf [file NIHMS1651220-supplement-1.pdf]
